# Supplementary material for: Zipfian Distributions in Child-Directed Speech
Source: PubMed Central journal article supplement (PMC9987348; doi:10.1162/opmi_a_00070), 2023-01-24
Supplement: opmi-07-1-s001.pdf [file opmi-07-1-s001.pdf]

## Supplementary Material

**Table S1.** Summary of corpora measures across development for Study 2 for German, French, Japanese and Hebrew.

| Language | Child's Age Range | No. Tokens | No. Types | Word Frequency (per million)   | $\alpha$             | $\beta$               | Pearson's-r            |
|----------|-------------------|------------|-----------|--------------------------------|----------------------|-----------------------|------------------------|
| German   | 0;7-0;11          | 988        | 403       | 1 - 36<br>(1012.15 - 36437.25) | -                    | -                     | -                      |
|          | 1;0-1;5           | 96399      | 5137      | 1 - 3907<br>(10.38 - 40529.47) | 1.35                 | 8.62                  | 0.995                  |
|          | 1;6-1;11          | 250243     | 9070      | 1 - 8472<br>(4.0 - 33855.09)   | 1.4                  | 11.68                 | 0.996                  |
|          | 2;0-2;5           | 948883     | 21204     | 1 - 30903<br>(1.05 - 32567.77) | 1.41                 | 12.23                 | 0.997                  |
|          | 2;6-2;11          | 652846     | 19244     | 1 - 21041<br>(1.53 - 32229.65) | 1.39                 | 11.24                 | 0.998                  |
|          | 3;0-3;5           | 194773     | 9681      | 1 - 6159<br>(5.13 - 31621.43)  | 1.36                 | 10.7                  | 0.998                  |
|          | 3;6-3;8           | 27514      | 3335      | 1 - 950<br>(36.35 - 34527.88)  | -                    | -                     | -                      |
|          |                   |            |           |                                | Mean=1.38<br>SD=0.03 | Mean=10.89<br>SD=1.39 | Mean=0.997<br>SD=0.001 |
| French   | 0;11-0;11         | 6929       | 868       | 1 - 327<br>(144.32 - 47192.96) | -                    | -                     | -                      |
|          | 1;0-1;5           | 192914     | 6387      | 1 - 9222<br>(5.18 - 47803.68)  | 1.52                 | 16.53                 | 0.978                  |
|          | 1;6-1;11          | 327364     | 9212      | 1 - 12401<br>(3.05 - 37881.38) | 1.48                 | 15.47                 | 0.994                  |
|          | 2;0-2;5           | 412244     | 9600      | 1 - 15626<br>(2.43 - 37904.74) | 1.51                 | 16.85                 | 0.993                  |
|          | 2;6-2;11          | 384360     | 9969      | 1 - 14417<br>(2.60 - 37509.11) | 1.49                 | 16.9                  | 0.991                  |
|          | 3;0-3;5           | 193880     | 7185      | 1 - 7062<br>(5.16 - 36424.60)  | 1.48                 | 16.53                 | 0.991                  |
|          | 3;6-3;11          | 114253     | 5527      | 1 - 4650<br>(8.75 - 40699.15)  | 1.44                 | 15.28                 | 0.987                  |
|          | 4;0-4;5           | 73173      | 4397      | 1 - 2711<br>(13.67 - 37049.18) | 1.44                 | 16.12                 | 0.99                   |
|          | 4;7-4;11          | 22481      | 2274      | 1 - 711<br>(44.48 - 31626.71)  | 1.38                 | 14.2                  | 0.994                  |
|          |                   |            |           |                                | Mean=1.48<br>SD=0.03 | Mean=16.24<br>SD=0.64 | Mean=0.989<br>SD=0.005 |
| Japanese | 0;6-0;11          | 2887       | 484       | 1 - 190<br>(346.38 - 65812.26) | -                    | -                     | -                      |
|          | 1;0-1;5           | 66623      | 5075      | 1 - 2793<br>(15.01 - 41922.46) | 1.26                 | 7.5                   | 0.995                  |

|               |          |        |       |                                |                      |                      |                        |
|---------------|----------|--------|-------|--------------------------------|----------------------|----------------------|------------------------|
|               | 1;6-1;11 | 144204 | 7178  | 1 - 7168<br>(6.93 - 49707.36)  | 1.28                 | 6.7                  | 0.995                  |
|               | 2;0-2;5  | 214916 | 9806  | 1 - 11136<br>(4.65 - 51815.59) | 1.26                 | 6.24                 | 0.991                  |
|               | 2;6-2;11 | 255479 | 12271 | 1 - 12210<br>(3.91 - 47792.58) | 1.25                 | 5.81                 | 0.997                  |
|               | 3;0-3;5  | 230124 | 12373 | 1 - 11216<br>(4.35 - 48738.94) | 1.24                 | 5.9                  | 0.993                  |
|               | 3;6-3;11 | 198059 | 11268 | 1 - 9850<br>(5.05 - 49732.66)  | 1.23                 | 5.77                 | 0.991                  |
|               | 4;0-4;5  | 79431  | 6942  | 1 - 3595<br>(12.56 - 45259.41) | 1.19                 | 5.23                 | 0.994                  |
|               | 4;6-4;11 | 54473  | 5773  | 1 - 2456<br>(18.36 - 45086.56) | 1.17                 | 5.06                 | 0.991                  |
|               |          |        |       |                                | Mean=1.24<br>SD=0.04 | Mean=6.03<br>SD=0.79 | Mean=0.993<br>SD=0.002 |
| <b>Hebrew</b> | 1;0-1;5  | 5703   | 1349  | 1 - 266<br>(175.35 - 46642.12) | -                    | -                    | -                      |
|               | 1;6-1;11 | 69794  | 5140  | 1 - 3976<br>(14.33 - 56967.65) | 1.16                 | 3.06                 | 0.995                  |
|               | 2;0-2;5  | 119972 | 7838  | 1 - 6410<br>(8.34 - 53429.13)  | 1.16                 | 3.18                 | 0.997                  |
|               | 2;6-2;11 | 78251  | 6579  | 1 - 4130<br>(12.78 - 52778.88) | 1.14                 | 3.19                 | 0.997                  |
|               | 3;0-3;5  | 22701  | 3367  | 1 - 1092<br>(44.05 - 48103.61) | -                    | -                    | -                      |
|               | 3;6-3;11 | 8638   | 1998  | 1 - 383<br>(115.77 - 44338.97) | -                    | -                    | -                      |
|               |          |        |       |                                | Mean=1.15<br>SD=0.01 | Mean=3.14<br>SD=0.07 | Mean=0.996<br>SD=0.001 |

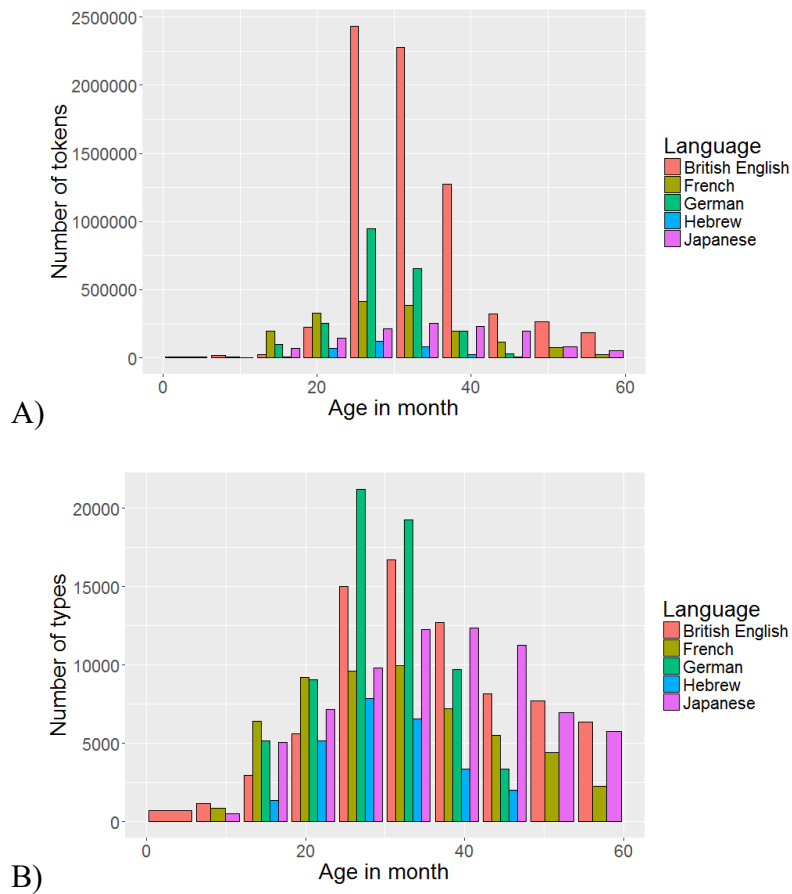

**Figure S1.** Number of tokens (A) and number of types (B) for each age bin in months, by language.

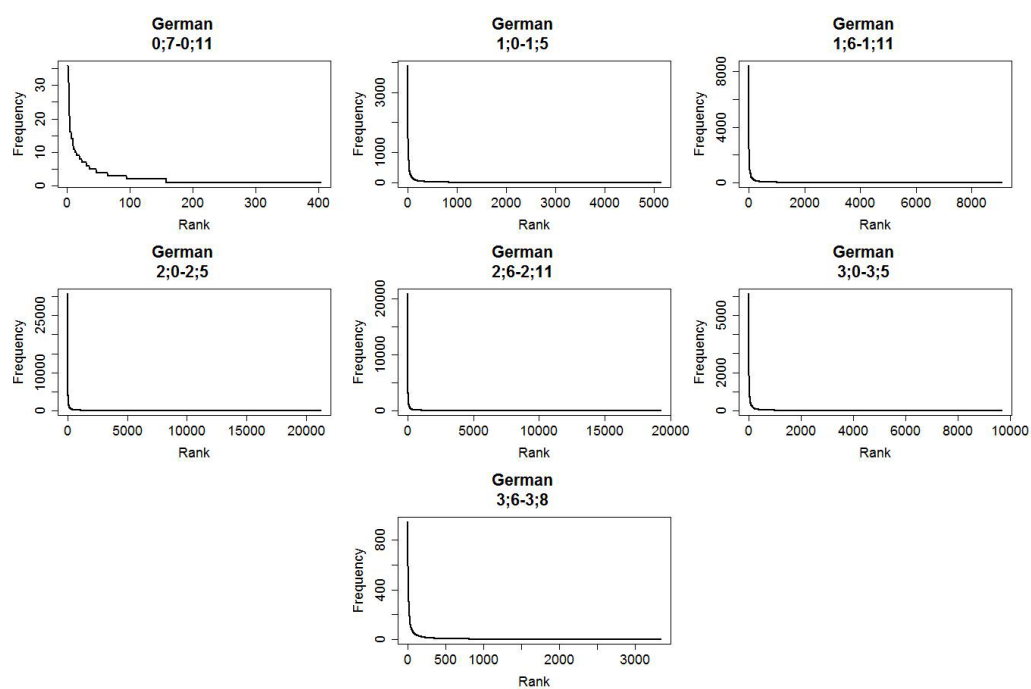

**Figure S2.** The observed word distribution for all age bins for German. Including age bins that did not reach the minimal size requirement.

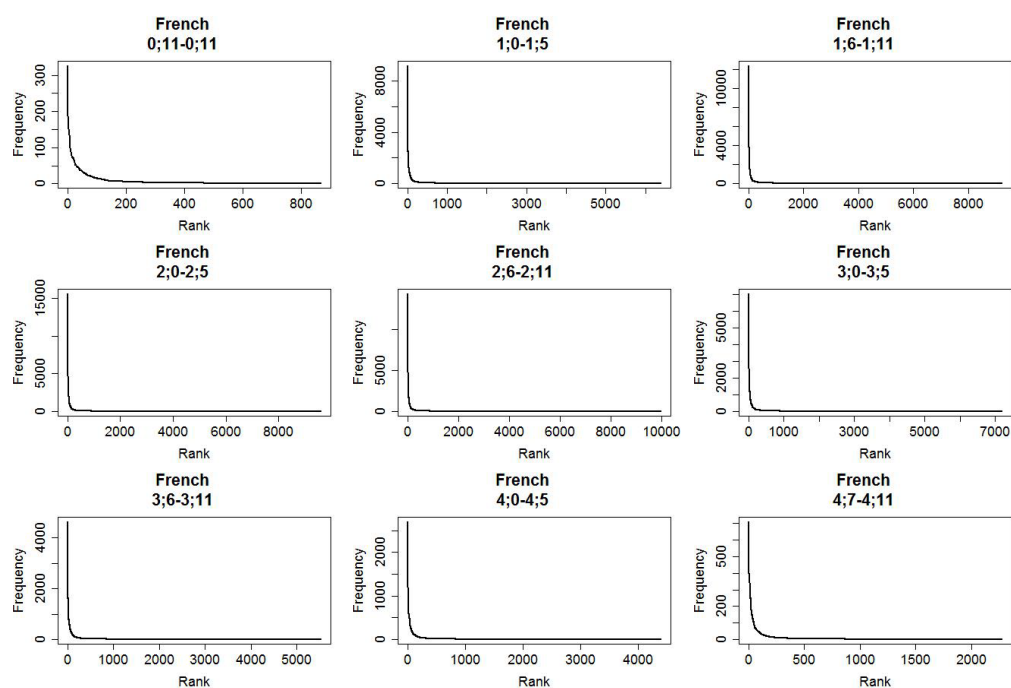

**Figure S3.** The observed word distribution for all age bins for French. Including age bins that did not reach the minimal size requirement.

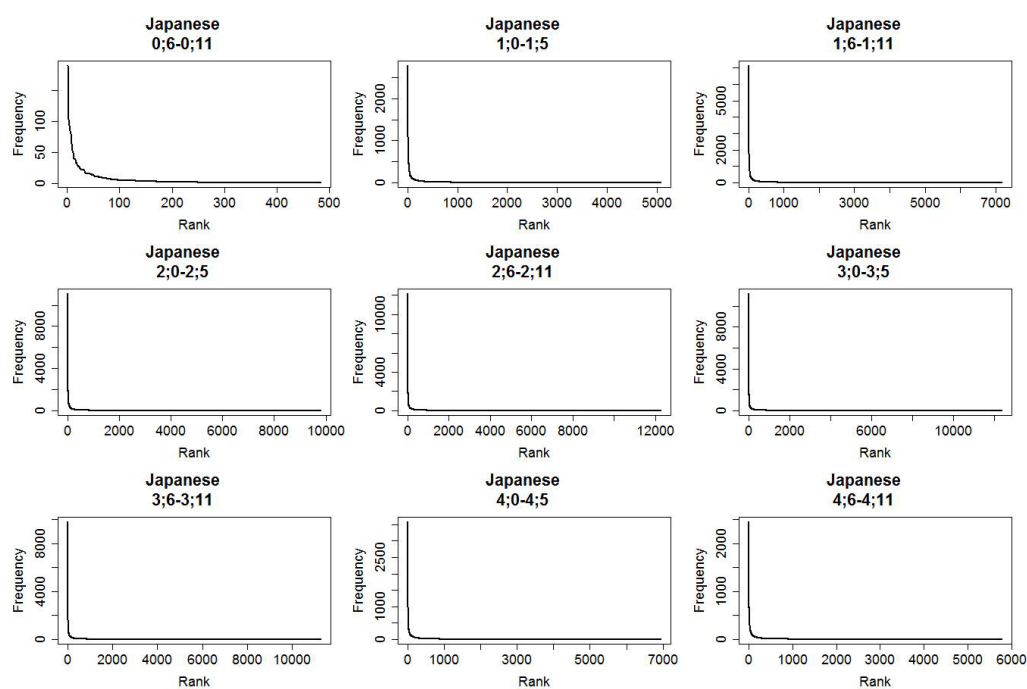

**Figure S4.** The observed word distribution for all age bins for Japanese. Including age bins that did not reach the minimal size requirement.

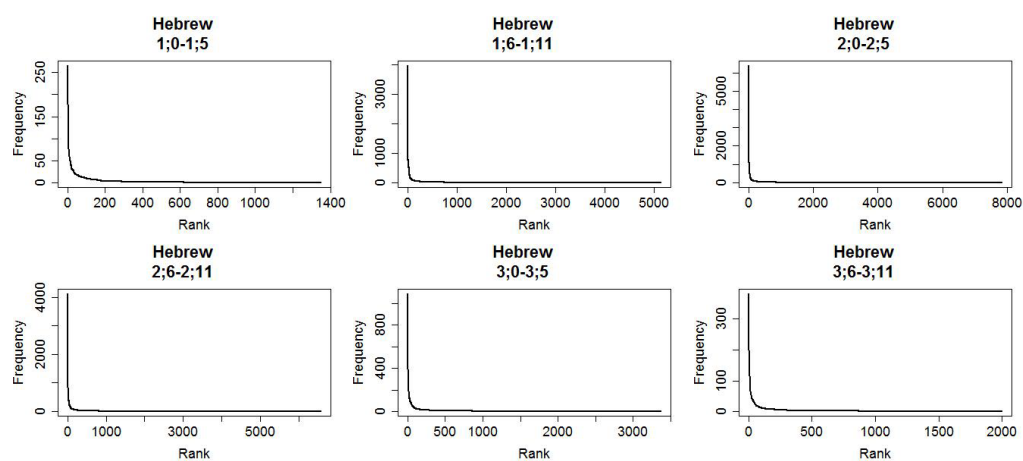

**Figure S5.** The observed word distribution for all age bins for Hebrew. Including age bins that did not reach the minimal size requirement.

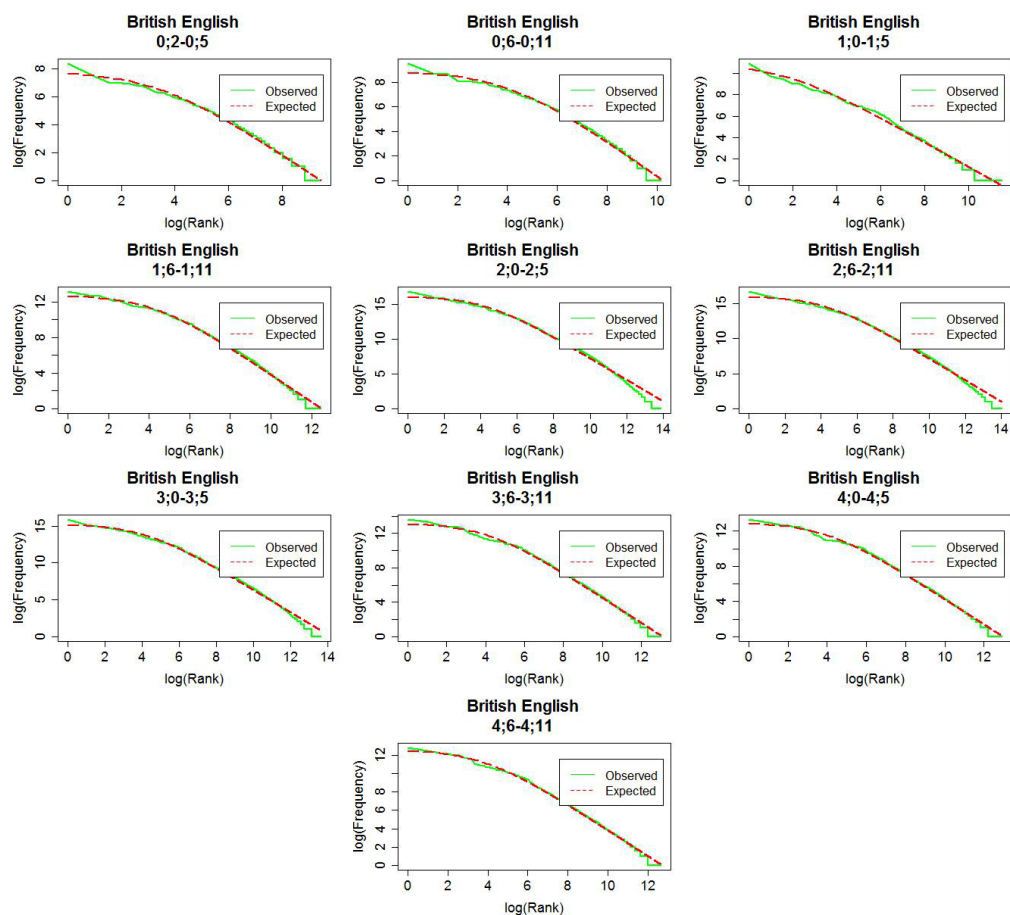

**Figure S6.** The observed (in green) and expected (in red) distributions on a log-log scale, for all British-English age bins that passed the minimal size requirements

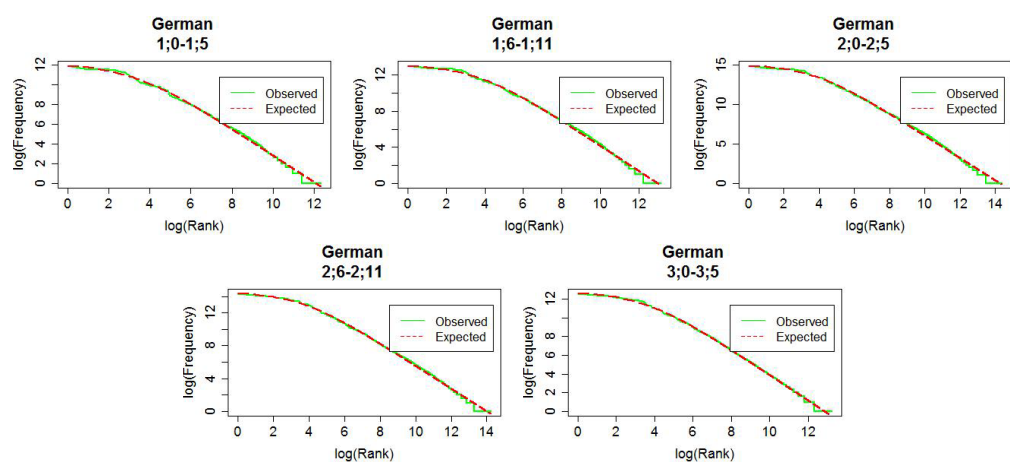

**Figure S7.** The observed (in green) and expected (in red) distributions on a log-log scale, for all German age bins that passed the minimal size requirements

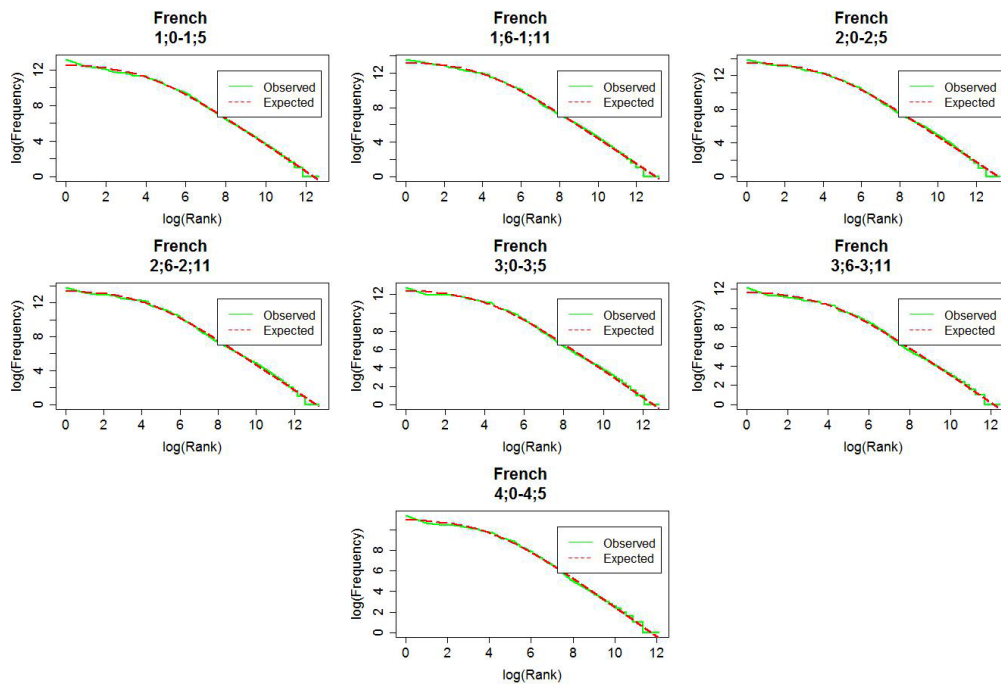

**Figure S8.** The observed (in green) and expected (in red) distributions on a log-log scale, for all French age bins that passed the minimal size requirements

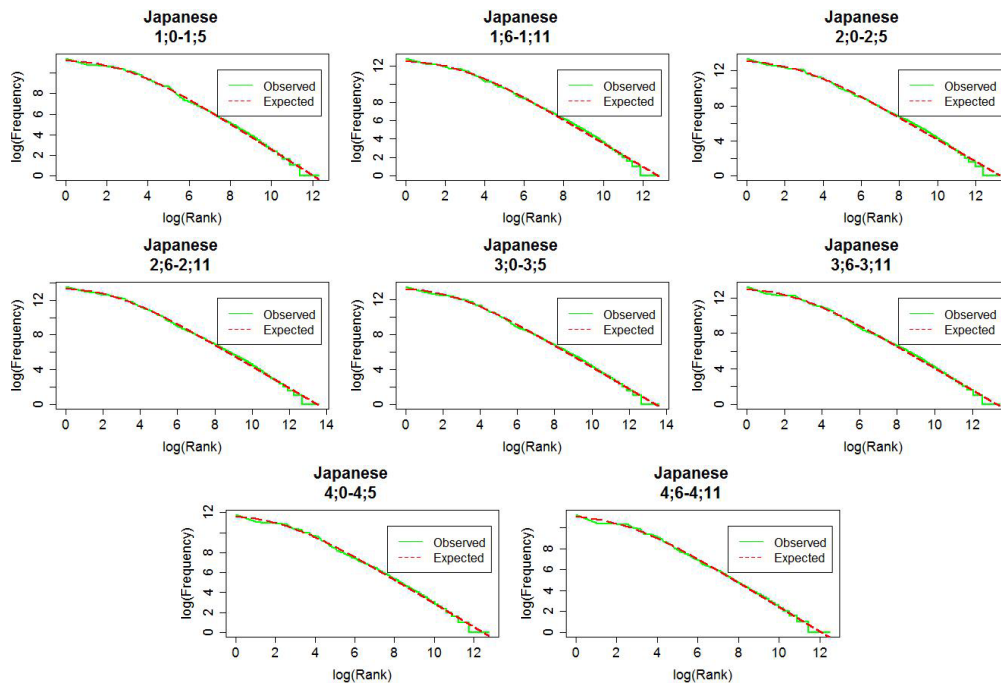

**Figure S9.** The observed (in green) and expected (in red) distributions on a log-log scale, for all Japanese age bins that passed the minimal size requirements

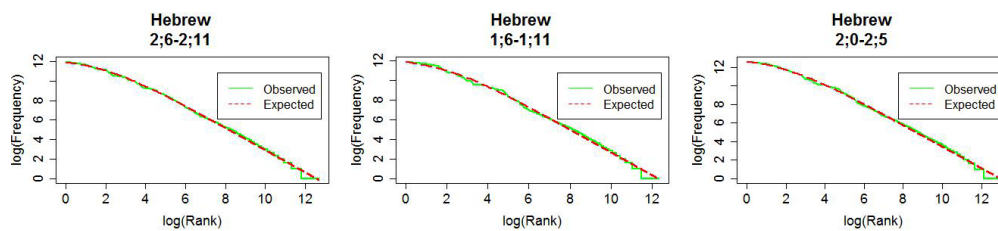

**Figure S10.** The observed (in green) and expected (in red) distributions on a log-log scale, for all Hebrew age bins that passed the minimal size requirements



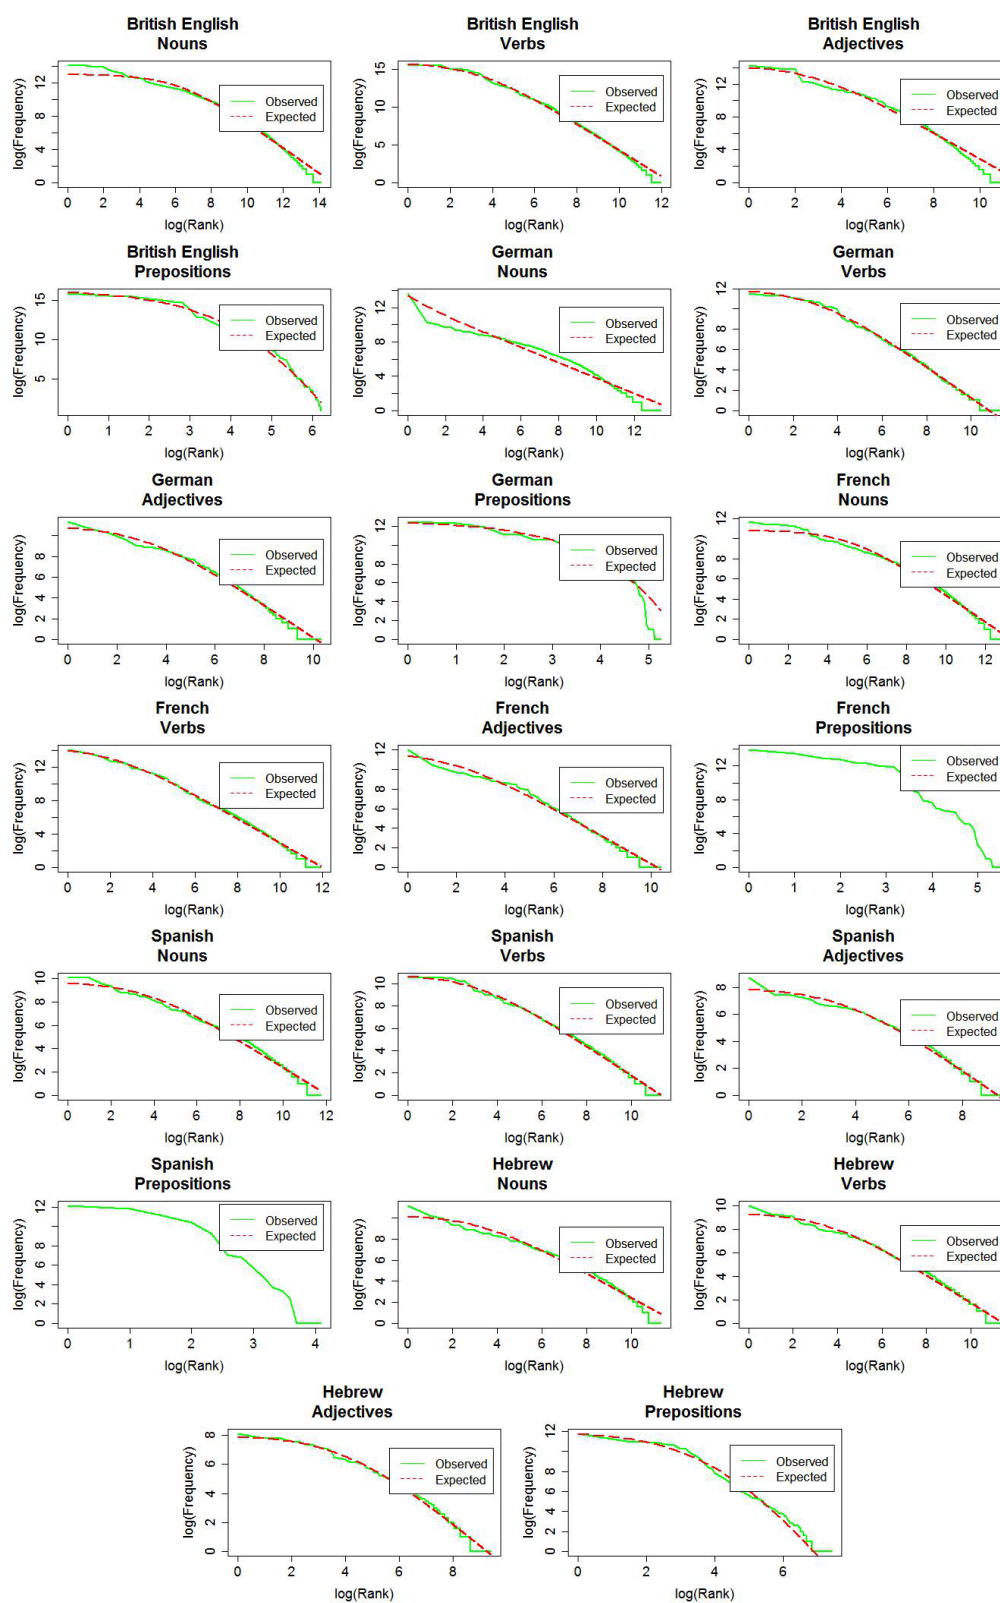

**Figure S11.** The observed (in green) and expected (in red) distributions for British English, German, French, Spanish and Hebrew for four parts of speech. Results are shown in a log(frequency)-log(rank) coordinates.
